1 TITLE

2 Rare but elevated incidence of hematological malignancy after clozapine use in  
3 schizophrenia: a population cohort study

4 Yuqi Hu, MSc<sup>1 +</sup>, Le Gao, PhD<sup>1 +</sup> Lingyue Zhou, MPH<sup>1</sup> Wenlong Liu, MSc<sup>1</sup> Cuiling Wei,  
5 BEng<sup>1</sup> Boyan Liu, BSc<sup>1</sup> Qi Sun, MSc<sup>1</sup> Wenxin Tian, MPH<sup>1,4</sup> Rachel Yui Ki Chu, MPH<sup>1,3</sup> Song  
6 Song, MSc<sup>1,4</sup> Franco Wing Tak Cheng, PhD<sup>1</sup> Joe Kwun Nam Chan, PhD<sup>3</sup> Amy Pui Pui Ng,  
7 MD<sup>2</sup> Heidi Ka Ying Lo, MBChB<sup>3</sup> Krystal Chi Kei Lee, MBBS<sup>3</sup> Wing Chung Chang, MD<sup>3,5</sup>  
8 William Chi Wai Wong, MD<sup>2</sup> Esther Wai Yin Chan, PhD<sup>1,4</sup> Ian Chi Kei Wong, PhD<sup>1,4,6,7</sup> Yi  
9 Chai, PhD<sup>1,4,8</sup> ✱, Francisco Tsz Tsun Lai, PhD<sup>1,2,4,6</sup> ✱ ✱

10 AFFILIATIONS

- 11 1. Centre for Safe Medication Practice and Research, Department of Pharmacology and  
12 Pharmacy, Li Ka Shing Faculty of Medicine, The University of Hong Kong, Hong Kong SAR  
13 2. Department of Family Medicine and Primary Care, School of Clinical Medicine, Li Ka Shing  
14 Faculty of Medicine, The University of Hong Kong, Hong Kong SAR  
15 3. Department of Psychiatry, School of Clinical Medicine, Li Ka Shing Faculty of Medicine,  
16 The University of Hong Kong, Hong Kong SAR  
17 4. Laboratory of Data Discovery for Health (D<sup>2</sup>4H), Hong Kong Science Park, Sha Tin, Hong  
18 Kong SAR  
19 5. State Key Laboratory of Brain & Cognitive Sciences, the University of Hong Kong, Hong  
20 Kong SAR  
21 6. Advanced Data Analytics for Medical Science (ADAMS) Limited, Hong Kong SAR  
22 7. Aston Pharmacy School, Aston University Birmingham, United Kingdom  
23 8. The Hong Kong Jockey Club Centre for Suicide Research and Prevention, The University of  
24 Hong Kong, Hong Kong SAR

25 + Contributed equally as first authors

26 ✱ Joint senior authors

27 \* Corresponding author. Postal address: L2-26A, Laboratory Block, Li Ka Shing Faculty of  
28 Medicine, The University of Hong Kong, 21 Sassoon Road, Pokfulam, Hong Kong SAR; Email:  
29 [fttlai@hku.hk](mailto:fttlai@hku.hk); Phone: +852 3910-3836

30 ABSTRACT

31 Background:

32 Recent disproportionality analyses and nationwide case-control studies suggested a potential  
33 association between clozapine use and hematological malignancy (HM). Nevertheless, the  
34 absolute rate difference is unclear due to the absence of cohort studies.

35 Methods:

36 We extracted data from a territory-wide public healthcare database in Hong Kong to build a  
37 retrospective cohort of anonymized patients aged 18+ with a diagnosis of schizophrenia who  
38 used clozapine or olanzapine (drug comparator with highly similar chemical structure and  
39 pharmacological mechanisms) for 90+ days, with at least two prior other antipsychotic use  
40 records within both groups. Weighted by inverse probability of treatment based on propensity  
41 scores, Poisson regression was used to estimate the incidence rate ratio (IRR) of HM between  
42 clozapine and olanzapine users. The absolute rate difference was also estimated.

43 Results:

44 In total, 9,965 patients were included, with 834 clozapine users, who had a significant IRR of  
45 2.22 (95% CI 1.52, 3.34) for HM compared to olanzapine users. Absolute rate difference was  
46 estimated to be 57.40 (95% CI 33.24, 81.55) per 100,000 person-years. Findings were  
47 consistent across sub-groups by age and sex in terms of effect size, although the IRR was non-  
48 significant for those aged 65 or older. Sensitivity analyses all supported the robustness of the  
49 results and showed good specificity to HM but no other cancers.

50 Conclusion:

51 Absolute rate difference in HM incidence was very small although there is a twofold elevated  
52 rate. Pharmacotherapies with clozapine may consider this potential rare risk in addition to  
53 known side effects.

54

55 KEYWORDS

56 Cancer epidemiology; haematology; oncology; psychopharmacology; real-world evidence;  
57 treatment-resistant schizophrenia

58

## 59 INTRODUCTION

60 The rare yet elevated incidence of cancer associated with antipsychotic use, particularly breast  
61 cancer, has been noted in previous research.<sup>1-3</sup> However, randomized controlled trials  
62 investigating these relatively rare long-term safety outcomes are oftentimes infeasible. Of note,  
63 real-world evidence on the risk of hematological malignancy (HM) associated with the use of  
64 clozapine, an atypical antipsychotic agent, is accruing. A disproportionality analysis of  
65 VigiBase® in 2020 initially provided preliminary analytical evidence on such an association  
66 for clozapine.<sup>4</sup> This finding underscores the need for further pharmacovigilance actions.<sup>5</sup>  
67 Previous research has shown that clozapine is associated with hematological abnormalities,  
68 such as agranulocytosis, eosinophilia and thrombocytopenia.<sup>6</sup> In 2022, a nationwide Finnish  
69 study used a population-based case-control design and suggested a threefold increase in the  
70 odds of HM after using clozapine compared to other antipsychotics.<sup>7</sup> Similarly, a recent case-  
71 control study using the United States Veteran Health Administration Database showed  
72 comparable results.<sup>8</sup> Due to their retrospective ascertainment of antipsychotic use, however,  
73 the comparison between specific antipsychotic agents is not without limitations. Though there  
74 was also a cohort study design in the Finnish study, it was used to estimate the crude incidence  
75 rate of HM without multivariable analyses. The absolute rate difference, e.g., number of HM  
76 cases associated with clozapine use per 100,000 person years, remains to be estimated.

77 Moreover, clozapine is typically initiated at a different level of drug resistance in patients  
78 compared to most other antipsychotics.<sup>9</sup> In fact, it is the only drug approved by the U.S. Food  
79 and Drug Administration for treatment-resistant schizophrenia.<sup>10</sup> Hence, before using  
80 clozapine, patients have likely used other antipsychotics, and indication bias or confounding  
81 by other drugs is highly plausible. Unfortunately, the comparison between clozapine and other  
82 drugs on a comparable timeframe was not feasible in the retrospective case-control approach  
83 to the ascertainment of drug use. In light of this potential bias, an analytic cohort study that  
84 takes into consideration previous drug use as a proxy for the level of drug resistance is needed  
85 to substantiate the findings. Of equal importance, a cohort study can provide an estimate of the  
86 potential absolute rate difference to better inform clinical decisions.

87 In this study, we took advantage of a territory-wide public healthcare database in Hong Kong  
88 with comprehensive linkage to various healthcare attendance records, diagnoses and  
89 medication use among people with schizophrenia. We aimed to test for the association of  
90 clozapine use with HM in comparison with olanzapine users, adjusting for prior other  
91 antipsychotic use within both groups. Olanzapine was chosen as a comparator due to its similar  
92 chemical structure and increasing advocacy in recent years for it to serve as an alternative to  
93 clozapine for treatment-resistant schizophrenia.<sup>11,12</sup> We hypothesize an elevated risk of HM  
94 following the use of clozapine compared with olanzapine.

95

## 96 METHODS

### 97 *Data source*

98 We adopted a retrospective cohort study design for this study. The Hospital Authority of Hong  
99 Kong, which is the sole provider of public inpatient services and a major provider of public  
100 outpatient services, provided strictly anonymized and de-identified electronic health records  
101 for data analysis. As all legal residents of Hong Kong are eligible for receiving services from  
102 the public sector, the database essentially covers the entire population and all territories of

103 Hong Kong. The electronic health records were extracted from the Clinical Management  
104 System in which clinicians input routine patient attendance, diagnosis and medication records  
105 daily, linked by a unique person identity number. Diagnoses are coded based on the  
106 International Classification of Diseases, Ninth Revision, Clinical Modifications (ICD-9-CM),  
107 while medications are coded with British National Formulary codes as well as generic names,  
108 with dosage and duration information also available. Timestamps are available for every record  
109 entry, facilitating the delineation of the temporality of records and events. Many  
110 pharmacoepidemiologic research studies have already been published using this database,<sup>13-16</sup>  
111 with the accuracy of diagnostic codes well established.<sup>17</sup>

## 112 *Participants*

113 We included anonymized patients aged 18 years or older with a diagnosis of schizophrenia  
114 (ICD-9-CM code 295) and a record of using clozapine or olanzapine for a duration of 90 days  
115 or more in January 2001 - August 2022. The first prescription of clozapine or olanzapine date  
116 was designated as the index date. Patients who i.) did not use at least two other antipsychotics  
117 before the index date, ii.) those who ever used both clozapine and olanzapine in their  
118 prescription history, and iii.) those who had a prior record of any cancers(including HM) before  
119 the index date were excluded. Records dating back to the year 1999 were used to execute these  
120 exclusion criteria. Patients were followed from the index date (i.e., 90 days or more clozapine  
121 or olanzapine use) until i.) the diagnosis of HM, ii.) death, iii.) five years after the cessation of  
122 olanzapine or clozapine use, or iv.) end of data availability (i.e., August 31<sup>st</sup> 2022), whichever  
123 came earliest.

124 Ethics approval for this study was obtained from the Institutional Review Board of the  
125 University of Hong Kong/ Hospital Authority Hong Kong West Cluster (HKU/HA HKW IRB,  
126 reference number: UW 20-113). Informed consent was waived as a requirement for ethics  
127 approval because the data were all anonymized.

## 128 *Outcomes*

129 Any HM diagnosis (ICD-9-CM codes 200-209, 238.4, 238.5, 238.6, 238.7, detail in **eTable 1**)  
130 as a composite measure was adopted as the outcome of this study.

## 131 *Exposure and comparator*

132 Clozapine and olanzapine were identified by their generic names in the electronic health  
133 records. We did not consider a 7-day, or a shorter, gap between repeated prescriptions of  
134 antipsychotics as a discontinuation given a half-life of olanzapine ranging from 21 to 54  
135 hours.<sup>18</sup> Clozapine was the primary exposure in this study while olanzapine was the comparator.

## 136 *Statistical analysis*

137 Poisson regression was used to estimate the incidence rate ratio (IRR) with 95% confidence  
138 intervals (CI) of HM between clozapine and olanzapine users, with an offset term to account  
139 for varying follow-up times for each patient. The inverse probability of treatment weighting  
140 (IPTW), using a propensity score, was applied to balance the characteristics between the  
141 clozapine and olanzapine users. The score was estimated by the logistics regression,  
142 considering covariates including age, sex, previous use of categories of antipsychotics  
143 according to their chemical structure (phenothiazines, thioxanthene derivatives,  
144 diphenylbutylpiperidine derivatives, butyrophenone derivatives, benzamides, indole

145 derivatives, diazepines, oxazepines, thiazepines and oxepines, and other antipsychotics), prior  
146 mental disorder diagnoses (depression, bipolar disorder, and dementia), number of  
147 antipsychotic used in the past year, and immunological disease history (autoimmune disease  
148 and acquired immune deficiencies) which have been proven to associate with the HM also used  
149 as covariates<sup>19,20</sup>. **eTable 1** shows the ICD-9-CM codes and generic drug names used to  
150 ascertain the covariates. The standardized mean difference (SMD) was used to identify  
151 potential imbalances between clozapine and olanzapine users. Covariates with an SMD greater  
152 than 0.1 after IPTW were further adjusted in the regression model. In addition to IRRs,  
153 weighted absolute rate differences were also estimated between the two groups.

154 Subgroup analyses by age group and sex were conducted to provide specific estimates for  
155 different demographic strata. Additionally, several sensitivity analyses were conducted to test  
156 the robustness of our results: i) the cohort was further restricted to patients using clozapine or  
157 olanzapine for 180 days (instead of 90); ii) patients were censored for three years (instead of  
158 five) after their cessation of clozapine or olanzapine use; iii) a multivariable Poisson regression  
159 to employed to replicate the analysis; iv) a Cox regression with the IPTW approach was used  
160 to estimate the hazard ratio; and v) asthma (ICD-9-CM codes 493) and other cancers (ICD-9-  
161 CM codes 140-239, excluding HM) were used as negative control outcomes to check for any  
162 unmeasurable selection bias, as it shared the same potential source of bias with HM but was  
163 not causally related to antipsychotic exposure.

164 YH and LG were independent analysts of this study to minimize errors in coding and  
165 programming.

166

## 167 RESULTS

168 We identified 444,716 people from the database who had a prescription of antipsychotics  
169 between January 2001 and August 2022. After applying the exclusion criteria, the cohort size  
170 was 9,965, comprising 834 clozapine users and 9,131 olanzapine users. **Figure 1** shows the  
171 flowchart of the cohort selection procedure.

### 172 *Cohort characteristics*

173 **Table 1** shows the baseline characteristics of the cohort before and after applying IPTW.  
174 Before weighting, the mean age of the clozapine group ( $41.00 \pm 15.02$ ) was approximately five  
175 years younger than that of the olanzapine group. The olanzapine group had a higher proportion  
176 of men (54.0%) than women, while clozapine the group had a smaller proportion of men  
177 (46.6%). On average, the follow-up time of the clozapine users were 4540.90 days compared  
178 to 2664.43 days follow-up time in olanzapine users, and more clozapine users prescribed more  
179 than three kinds of other antipsychotics in the past year (59.5% versus 36.9%). Notable  
180 differences were observed in the types of previous antipsychotics use. Specifically,  
181 phenothiazines (82.6% versus 64.6%) and thioxanthene derivatives (52.8% versus 37.4%) were  
182 more often used previously among clozapine users than olanzapine users. However, more  
183 olanzapine users had used diazepines, oxazepines, thiazepines, and oxepines (39.5% versus  
184 28.4%), and ‘other antipsychotics’ (71.9% versus 57.3%). Additionally, a higher prevalence of  
185 psychiatric comorbidities and immunological diseases was observed among olanzapine users.  
186 After weighting, the SMD of characteristics were all less than 0.1 except prior benzamide use,  
187 which was adjusted in the subsequent weighted regression analysis.

188 *Main analysis*

189 **Figure 2** shows the weighted cumulative incidence curves of HM over the follow-up period  
190 for clozapine and olanzapine users. The incidence of HM among clozapine users was  
191 consistently higher than that among olanzapine users for nearly the entire follow-up period.

192 Among all 9,965 individuals exposed to olanzapine or clozapine, a total of 39 individuals were  
193 diagnosed with HM. Out of the 39 cases, nine individuals were clozapine users (n = 834), while  
194 the remaining 30 individuals were olanzapine users (n = 9,131). Six clozapine users and 23 in  
195 olanzapine users developed HM after discontinuing the medication. For the six clozapine users,  
196 the average number of days between their discontinuation and HM was 256.67 days. For the  
197 23 olanzapine users, the number was 713.86 days.

198 Results from the Poisson regression models show that compared to olanzapine users, clozapine  
199 users had a significantly higher IRR of 2.22 (95% CI 1.52, 3.34) for HM (**Table 2**). The  
200 absolute rate difference of HM between the two groups was 57.40 (95% CI 33.24, 81.55) per  
201 100,000 person-years.

202 Subgroup analyses showed a significantly elevated risk of HM among clozapine users for all  
203 sex and age groups, except for those aged 65 or older despite a comparable IRR.

204 *Sensitivity analysis*

205 Sensitivity analyses yielded similar results (**eTable 2**). The IRR for asthma as a negative  
206 control outcome was not significant and close to one (IRR 0.90, 95% CI 0.66,1.21). Likewise,  
207 the IRR for other cancers was estimated at 0.77 (95% CI 0.68, 0.86).

208

209 DISCUSSION

210 Findings from this territory-wide cohort study involving approximately 10,000 individuals  
211 with schizophrenia in Hong Kong suggested a rare but twofold increased rate of HM associated  
212 with clozapine compared to olanzapine. Nevertheless, the absolute rate difference is small, with  
213 less than 60 additional cases of HM per 100,000 person years of clozapine use compared with  
214 olanzapine use. Potential confounding factors, such as previous other antipsychotic use,  
215 underlying mental illnesses, and history of immunological diseases observed at the baseline,  
216 were properly adjusted. Subgroup analyses by age and sex, as well as sensitivity analyses,  
217 showed highly robust results, supporting a comparably strong and highly specific association.  
218 Our research hypothesis is therefore well supported by the data.

219 *Relationship with the literature*

220 To the best of our knowledge, this work is the world's first analytic cohort study on this  
221 association to estimate absolute rate differences, with only two prior notable case-control  
222 studies conducted in Finland<sup>7</sup> and the United States.<sup>8</sup> Although the Finnish study also provided  
223 descriptive data on the incidence of HM using a cohort design, no hypothesis testing was  
224 conducted in the cohort study. Indeed, our descriptive absolute risk estimates were highly  
225 comparable with the Finnish study's descriptive cohort.<sup>7</sup> The rarity of HM and the relatively  
226 low prevalence of clozapine use compared to some other widely used antipsychotics have both  
227 greatly limited previous research on this association, despite compelling evidence on the  
228 association between clozapine use and a range of hematological abnormalities.<sup>21-23</sup> In fact,

229 apart from this and the two case-control studies, existing evidence on an association with HM  
230 arose only from passive reporting systems using disproportionality analysis which may be  
231 subject to more biases than large electronic health record epidemiologic studies due to known  
232 limitations in adverse event reporting platforms and databases.<sup>5,24</sup> The previous case-control  
233 studies, despite the strengths of the national registry and comprehensive veteran health database,  
234 used retrospectively ascertained long-term clozapine use as the main exposure and ‘little to no  
235 such use’ as the comparator. This approach is not without limitations, as clozapine use is most  
236 typically preceded by a range of other antipsychotic use in the individuals because it is widely  
237 regarded as the most efficacious drug available.<sup>25</sup> Our current study address this challenge by  
238 confining our cohort to those who used two other antipsychotics before using clozapine (or  
239 olanzapine) and employing olanzapine as an active comparator.<sup>26</sup> This ensures a more proper  
240 adjustment of previous antipsychotic use before clozapine or olanzapine initiation. With a  
241 cohort design, we also estimated the absolute rate difference which is highly relevant in clinical  
242 decision making. The current study represented evidence that is one level higher up the clinical  
243 evidence pyramid compared with the existing knowledge, i.e., from case-control to cohort  
244 evidence.

#### 245 *Interpretation of observed association*

246 The strong association observed in this and the previous two case-control studies<sup>7</sup> as well as its  
247 good coherence with previous evidence on the hematological abnormalities<sup>27</sup> associated with  
248 clozapine constitute a strong case that this association is likely causal. We believe the effects  
249 of such abnormalities being induced by the prolonged use of clozapine may accumulate over  
250 the duration of use and potentially increase the risk of malignancy through a range of potential  
251 mechanisms.<sup>28</sup> For instance, recent evidence showed that the elevated risk of agranulocytosis  
252 following clozapine use may persist well over several years, and this mechanism could  
253 potentially impact the increased risk of other blood-related disorders among clozapine users,  
254 including a higher risk of HM.<sup>29</sup> We did not have a sufficient number of cases to separately  
255 analyze the type of HM with a more significantly elevated risk; inference about the specific  
256 underlying mechanism is thus limited. Further research should investigate specific HM types.

#### 257 *Potential clinical implications*

258 Despite a small rate difference, a potential strong association between clozapine use and HM,  
259 if substantiated by further evidence, would provide additional information to the safety profile  
260 of the drug compared to olanzapine. This potential slight recalibration of the risk-benefit  
261 balance may partially impact clinical decisions about long-term clozapine use. First,  
262 considering the markedly elevated risk of HM, despite its rare incidence, psychiatrists may be  
263 more inclined to try other antipsychotics before initiating clozapine, which is currently the most  
264 efficacious antipsychotic drug. Second, for individuals with significant hematological  
265 abnormalities detected early in the course of clozapine use, alternative drugs may be beneficial,  
266 as prolonged use of clozapine may be associated with a higher chance of HM. Third, patients  
267 with a family history of HM may benefit from reconsideration of clozapine prescription, as  
268 they have a higher baseline risk.<sup>30</sup> These potential considerations need to be supported by  
269 additional evidence, such as studies specific to individuals with a family history of HM and the  
270 relationship between detected hematological abnormalities and subsequent HM risks.

#### 271 *Strengths and limitations*

272 One of the key strengths of this study is the cohort design with a range of important covariates  
273 properly adjusted, e.g., prior antipsychotic use, providing highly useful information on the

274 absolute rate of HM and the rate difference. Additionally, the territory-wide database with  
275 comprehensive medical records based on the same coding system and practices also confers  
276 great strengths, such as good generalizability and representativeness of the findings.

277 There are, nevertheless, limitations that warrant caution. First, this evidence is observational  
278 without randomization, which may entail potential selection or indication bias. Nevertheless,  
279 blood tests prior to the prescription of clozapine should have already excluded people with a  
280 higher risk of HM; such indication bias, if any, might lead to an underestimation of the observed  
281 association. Moreover, it is difficult to conduct randomized prospective studies on such a rare  
282 outcome, so future research should likely still be focused on observational studies with multiple  
283 sites or even countries. Second, although olanzapine, particularly in high doses, can be useful  
284 for some cases, it is not a suggested replacement option for clozapine in the treatment-  
285 resistance schizophrenia due to the lack of a highly comparable indication.<sup>31</sup> Third, there are  
286 unobserved covariates such as socioeconomic status and lifestyle factors that were not included  
287 in this study. Fourth, there may be a detection bias of HM for clozapine, as it is known to be  
288 associated with hematological abnormalities which are closely monitored.<sup>32</sup> However, since  
289 we allowed the observation to last until five years after discontinuation to account for  
290 symptomatic presentation, the detection bias should not be significant. Also, the association is  
291 strong and unlikely to be purely arising from detection bias, i.e., earlier detection. In fact, our  
292 findings showed that a smaller proportion of HM cases was recorded during the use of  
293 clozapine than that during the use of olanzapine. Fifth, the dosage of treatment was not  
294 standardized during the course of treatment or across individuals and is subject to the  
295 psychiatrists' clinical judgement for each individual. Sixth, the follow-up time for the  
296 olanzapine group was shorter than that of the clozapine group, but it should likely be long  
297 enough to observe and capture the study outcome, with a mean follow-up time of more than  
298 seven years. Seventh, among clozapine users, many had used olanzapine before switching to  
299 clozapine in clinical practice but we excluded approximately 5,000 patients who had a history  
300 of using olanzapine either before or after starting clozapine treatment. This exclusion has  
301 limited our sample size although we arrived at a more selective sample for a fair comparison.  
302 Finally, the study population in Hong Kong is predominantly ethnic Chinese, and the  
303 generalizability of the findings to other populations need to be tested using multinational data.

## 304 CONCLUSIONS

305 To conclude, we conducted a territory-wide retrospective cohort study in Hong Kong and  
306 identified a rare but evidently elevated risk of HM, i.e., twofold, among clozapine users with  
307 schizophrenia compared with olanzapine users. If substantiated by further studies, the risk-  
308 benefit ratio of the long-term prescription of clozapine should be slightly recalibrated.



309 FUNDING

310 No specific funding was received for this project. FTTL and ICKW are partially supported by  
311 the Laboratory of Data Discovery for Health (D24H) funded by the by AIR@InnoHK  
312 administered by the Innovation and Technology Commission.

313 CONTRIBUTORS' STATEMENT

314 Yuqi Hu, Le Gao, Yi Chai and Francisco Lai contributed to the conception of the work. All  
315 authors designed the study. Yuqi Hu and Le Gao contributed to the acquisition and analysis of  
316 the data, and all authors interpreted the data. Yuqi Hu and Francisco Lai drafted the manuscript.  
317 All authors revised the manuscript critically for important intellectual content, gave final  
318 approval of the version to be published and agreed to be accountable for all aspects of the work.  
319 Yuqi Hu and Le Gao are co-first authors. Yi Chai and Francisco Lai share the senior authorship,  
320 had full access to all the data in the study and took final responsibility for the decision to submit  
321 for publication.

322 COMPETING INTERESTS

323 None declared.

324 ACKNOWLEDGEMENTS

325 The authors thank the Hospital Authority for the generous provision of data and gratefully  
326 acknowledge Professor Martin Roland of the University of Cambridge for his invaluable advice.

327 DATA AVAILABILITY

328 The data underlying the results presented in the study are available from Hong Kong Hospital  
329 Authority's Central Panel on Administrative Assessment of External Data Requests  
330 (<https://www3.ha.org.hk/data/Provision/Submission>).

331

## 332 REFERENCES

- 333 1. Leung JCN, Ng DWY, Chu RYK, et al. Association of antipsychotic use with breast  
334 cancer: a systematic review and meta-analysis of observational studies with over 2 million  
335 individuals. *Epidemiol Psychiatr Sci.* Sep 5 2022;31:e61.  
336 doi:10.1017/s2045796022000476
- 337 2. Chu RYK, Wei Y, Osborn DP, et al. Breast cancer risks following antipsychotic use in  
338 women with bipolar disorder versus schizophrenia: A territory-wide nested case-control  
339 study spanning two decades. *Psychiatry Res.* Aug 2023;326:115287.  
340 doi:10.1016/j.psychres.2023.115287
- 341 3. Taipale H, Solmi M, Lähtenvuo M, Tanskanen A, Correll CU, Tiihonen J. Antipsychotic  
342 use and risk of breast cancer in women with schizophrenia: a nationwide nested case-  
343 control study in Finland. *Lancet Psychiatry.* Oct 2021;8(10):883-891. doi:10.1016/s2215-  
344 0366(21)00241-8
- 345 4. Chrétien B, Lelong-Boulouard V, Chantepie S, et al. Haematologic malignancies  
346 associated with clozapine v. all other antipsychotic agents: a pharmacovigilance study in  
347 VigiBase(®). *Psychol Med.* Jul 2021;51(9):1459-1466. doi:10.1017/s0033291720000161
- 348 5. de Leon J, De Las Cuevas C, Sanz EJ, Verdoux H. The association of clozapine and  
349 hematological malignancies needs to be replicated by other studies and more importantly  
350 by analyses of subsamples from VigiBase. *Psychol Med.* Jun 2021;51(8):1405-1406.  
351 doi:10.1017/s0033291720001233
- 352 6. Grover S, Shouan A, Chakrabarti S, Avasthi A. Hematological side effects associated with  
353 clozapine: A retrospective study from India. *Asian Journal of Psychiatry.* 2020/02/01/  
354 2020;48:101906. doi:<https://doi.org/10.1016/j.ajp.2019.101906>
- 355 7. Tiihonen J, Tanskanen A, Bell JS, Dawson JL, Kataja V, Taipale H. Long-term treatment  
356 with clozapine and other antipsychotic drugs and the risk of hematological malignancies  
357 in people with schizophrenia: a nationwide case-control and cohort study in Finland.  
358 *Lancet Psychiatry.* May 2022;9(5):353-362. doi:10.1016/s2215-0366(22)00044-x
- 359 8. Brainerd DR, Alexander B, Tague MJ, Lund BC. Association Between Clozapine  
360 Exposure and Risk of Hematologic Malignancies in Veterans With Schizophrenia. *Journal*  
361 *of Clinical Psychiatry.* 2024;85(2):23m15149.
- 362 9. Kane J, Honigfeld G, Singer J, Meltzer H. Clozapine for the treatment-resistant  
363 schizophrenic. A double-blind comparison with chlorpromazine. *Arch Gen Psychiatry.*  
364 Sep 1988;45(9):789-96. doi:10.1001/archpsyc.1988.01800330013001
- 365 10. Fenton C, Kang C. Clozapine is the approved option in treatment-resistant schizophrenia  
366 and requires careful management. *Drugs Ther Perspect.* 2023;39(3):107-113.  
367 doi:10.1007/s40267-023-00982-6
- 368 11. Souza JS, Kayo M, Tassell I, Martins CB, Elkis H. Efficacy of olanzapine in comparison  
369 with clozapine for treatment-resistant schizophrenia: evidence from a systematic review  
370 and meta-analyses. *CNS Spectr.* Apr 2013;18(2):82-9. doi:10.1017/s1092852912000806
- 371 12. Gannon L, Reynolds J, Mahon M, Gaughran F, Lally J. High-dose olanzapine in  
372 treatment-resistant schizophrenia: a systematic review. *Ther Adv Psychopharmacol.*  
373 2023;13:20451253231168788. doi:10.1177/20451253231168788
- 374 13. Lai FTT, Li X, Peng K, et al. Carditis After COVID-19 Vaccination With a Messenger  
375 RNA Vaccine and an Inactivated Virus Vaccine : A Case-Control Study. *Ann Intern Med.*  
376 Mar 2022;175(3):362-370. doi:10.7326/m21-3700
- 377 14. Huang C, Wei Y, Yan VKC, et al. Vaccine effectiveness of BNT162b2 and CoronaVac  
378 against SARS-CoV-2 omicron infection and related hospital admission among people with  
379 substance use disorder in Hong Kong: a matched case-control study. *Lancet Psychiatry.*  
380 Jun 2023;10(6):403-413. doi:10.1016/s2215-0366(23)00111-6

- 381 15. Lau WC, Chan EW, Cheung CL, et al. Association Between Dabigatran vs Warfarin and  
382 Risk of Osteoporotic Fractures Among Patients With Nonvalvular Atrial Fibrillation.  
383 *Jama*. Mar 21 2017;317(11):1151-1158. doi:10.1001/jama.2017.1363
- 384 16. Man KKC, Chan EW, Ip P, et al. Prenatal antidepressant use and risk of attention-  
385 deficit/hyperactivity disorder in offspring: population based cohort study. *Bmj*. May 31  
386 2017;357:j2350. doi:10.1136/bmj.j2350
- 387 17. Wong AY, Root A, Douglas IJ, et al. Cardiovascular outcomes associated with use of  
388 clarithromycin: population based study. *Bmj*. Jan 14 2016;352:h6926.  
389 doi:10.1136/bmj.h6926
- 390 18. Callaghan JT, Bergstrom RF, Ptak LR, Beasley CM. Olanzapine. *Clinical*  
391 *Pharmacokinetics*. 1999/09/01 1999;37(3):177-193. doi:10.2165/00003088-199937030-  
392 00001
- 393 19. Hemminki K, Huang W, Sundquist J, Sundquist K, Ji J. Autoimmune diseases and  
394 hematological malignancies: Exploring the underlying mechanisms from epidemiological  
395 evidence. *Seminars in Cancer Biology*. 2020/08/01/ 2020;64:114-121.  
396 doi:<https://doi.org/10.1016/j.semcancer.2019.06.005>
- 397 20. Kimani SM, Painschab MS, Horner M-J, Muchengeti M, Fedoriw Y, Shiels MS, Gopal S.  
398 Epidemiology of hematological malignancies in people living with HIV. *The Lancet HIV*.  
399 2020;7(9):e641-e651.
- 400 21. Myles N, Myles H, Xia S, et al. Meta-analysis examining the epidemiology of clozapine-  
401 associated neutropenia. *Acta Psychiatrica Scandinavica*. 2018;138(2):101-109.  
402 doi:<https://doi.org/10.1111/acps.12898>
- 403 22. Myles N, Myles H, Xia S, et al. A meta-analysis of controlled studies comparing the  
404 association between clozapine and other antipsychotic medications and the development  
405 of neutropenia. *Australian & New Zealand Journal of Psychiatry*. 2019;53(5):403-412.  
406 doi:10.1177/0004867419833166
- 407 23. Ratanajamit C, Musakopas C, Vasiknanonte S, Reanmongkol W. Incidence and risk for  
408 neutropenia/agranulocytosis among clozapine users: A retrospective cohort study.  
409 *International Journal of Psychiatry in Clinical Practice*. 2010/01/01 2010;14(2):109-115.  
410 doi:10.3109/13651500903402450
- 411 24. Dawson JL, Sluggett JK, Procter NG, Myles N, Bell JS. Hematological and Other Cancers  
412 in People Using Clozapine: Analysis of Australian Spontaneous Reports Between 1995  
413 and 2020. *Journal of Clinical Psychopharmacology*. 2023;43(4):333-338.  
414 doi:10.1097/jcp.0000000000001699
- 415 25. Correll CU, Agid O, Crespo-Facorro B, de Bartolomeis A, Fagiolini A, Seppälä N, Howes  
416 OD. A Guideline and Checklist for Initiating and Managing Clozapine Treatment in  
417 Patients with Treatment-Resistant Schizophrenia. *CNS Drugs*. 2022/07/01  
418 2022;36(7):659-679. doi:10.1007/s40263-022-00932-2
- 419 26. Wintzell V, Svanström H, Pasternak B. Selection of Comparator Group in Observational  
420 Drug Safety Studies: Alternatives to the Active Comparator New User Design.  
421 *Epidemiology*. 2022;33(5):707-714. doi:10.1097/ede.0000000000001521
- 422 27. Blackman G, Lisshammar JEL, Zafar R, et al. Clozapine Response in Schizophrenia and  
423 Hematological Changes. *Journal of Clinical Psychopharmacology*. 2021;41(1):19-24.  
424 doi:10.1097/jcp.0000000000001329
- 425 28. Nooijen PMM, Carvalho F, Flanagan RJ. Hematological toxicity of clozapine and some  
426 other drugs used in psychiatry. *Human Psychopharmacology: Clinical and Experimental*.  
427 2011/03/01 2011;26(2):112-119. doi:<https://doi.org/10.1002/hup.1181>
- 428 29. Rubio JM, Kane JM, Tanskanen A, Tiihonen J, Taipale H. Long-term persistence of the  
429 risk of agranulocytosis with clozapine compared with other antipsychotics: a nationwide

- 430 cohort and case&#x2013;control study in Finland. *The Lancet Psychiatry*.  
431 doi:10.1016/S2215-0366(24)00097-X
- 432 30. Clemmensen SB, Harris JR, Mengel-From J, Bonat WH, Frederiksen H, Kaprio J,  
433 Hjelmberg JvB. Familial Risk and Heritability of Hematologic Malignancies in the Nordic  
434 Twin Study of Cancer. *Cancers*. 2021;13(12):3023.
- 435 31. Gannon L, Reynolds J, Mahon M, Gaughran F, Lally J. High-dose olanzapine in  
436 treatment-resistant schizophrenia: a systematic review. *Therapeutic Advances in*  
437 *Psychopharmacology*. 2023;13:20451253231168788.
- 438 32. Smessaert S, Detraux J, Desplenter F, De Hert M. Evaluating Monitoring Guidelines of  
439 Clozapine-Induced Adverse Effects: a Systematic Review. *CNS Drugs*. 2024/02/01  
440 2024;38(2):105-123. doi:10.1007/s40263-023-01054-z
- 441 33. Khokhar JY, Henricks AM, Sullivan ED, Green AI. Unique effects of clozapine: a  
442 pharmacological perspective. *Advances in pharmacology*. 2018;82:137-162.

444 Figure 1. Flow chart showing cohort selection processes.  
445

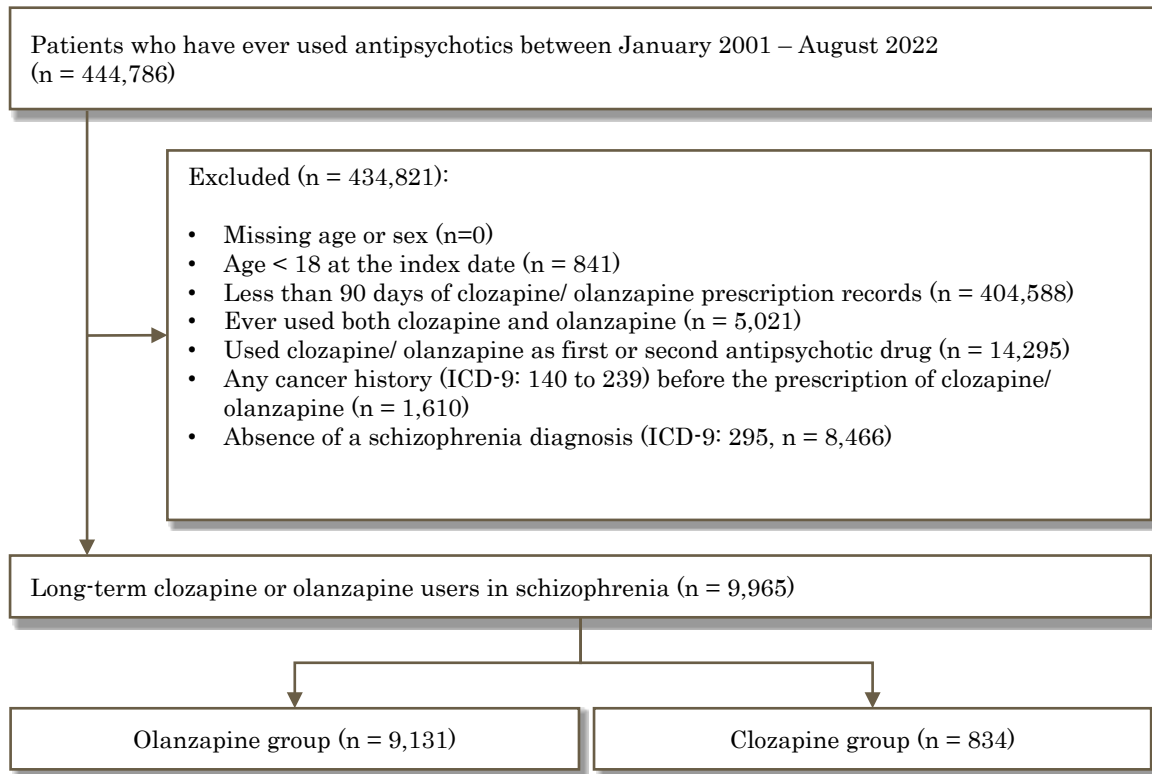

446

447 Figure 2. Cumulative incidence curves over the observation period by clozapine or  
 448 olanzapine use status. Yellow represents clozapine and blue represents olanzapine.

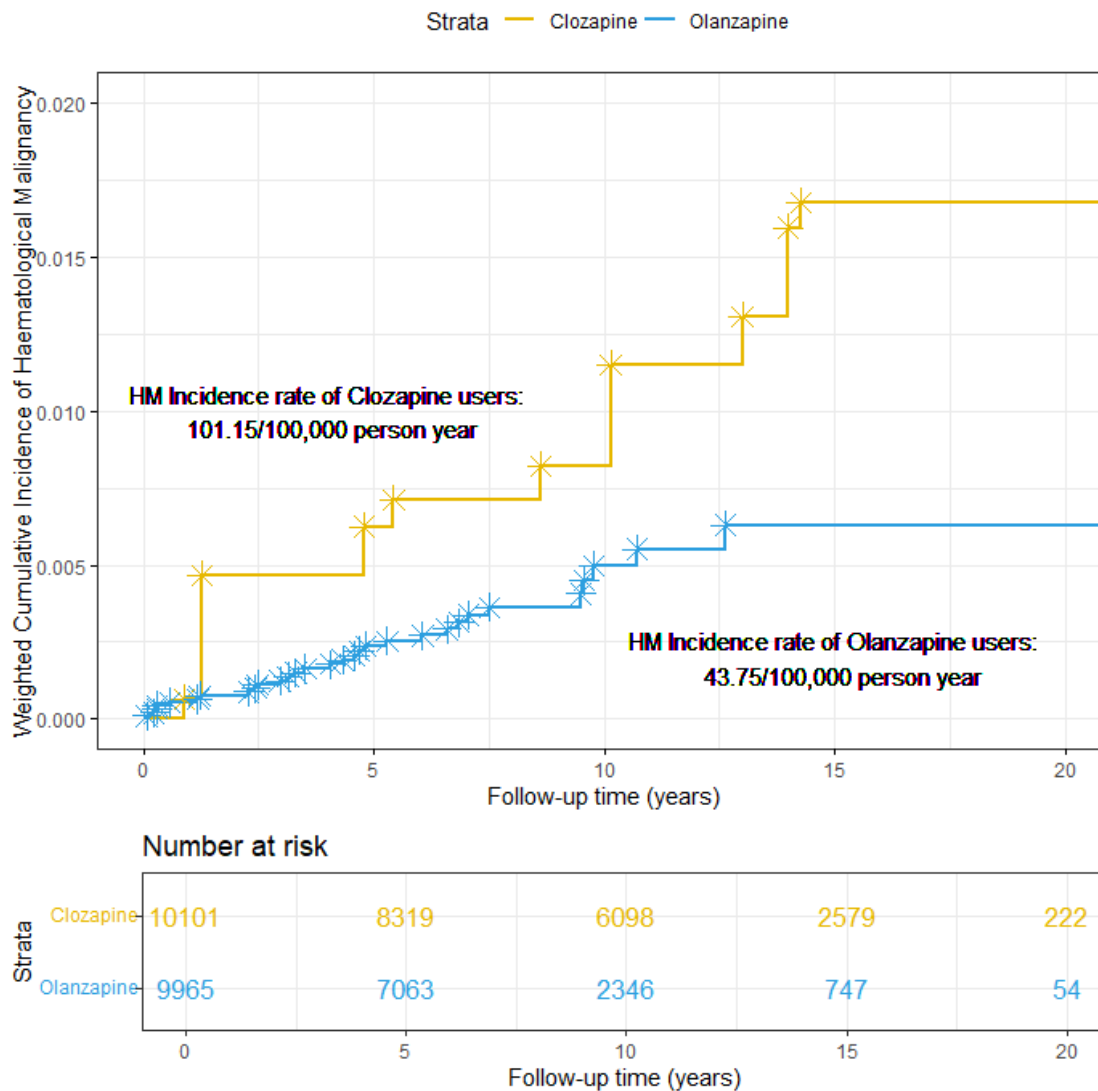

449

450

451

Table 1. Cohort characteristics

|                                                           | Unweighted   |            |                  | Weighted by inverse probability of treatment |             |                  |
|-----------------------------------------------------------|--------------|------------|------------------|----------------------------------------------|-------------|------------------|
|                                                           | Olanzapine   | Clozapine  | SMD <sup>a</sup> | Olanzapine                                   | Clozapine   | SMD <sup>a</sup> |
| <i>N</i>                                                  | 9131         | 834        |                  | 9964.8                                       | 10101.1     |                  |
| Mean age (standard deviation)                             | 46.48 (15.0) | 41 (11.5)  | 0.404            | 46.0 (14.9)                                  | 44.8 (12.9) | 0.084            |
| Sex (%)                                                   |              |            | 0.144            |                                              |             | 0.036            |
| Men                                                       | 4932 (54)    | 389 (46.6) |                  | 4643 (46.6)                                  | 4541 (45)   |                  |
| Women                                                     | 4199 (46)    | 445 (53.4) |                  | 5321 (53.4)                                  | 5560 (55)   |                  |
| Number of other antipsychotic drugs used in the past year |              |            | 0.515            |                                              |             | 0.024            |
| 0                                                         | 215 (2.4)    | 22(2.6)    |                  | 237 (2.4)                                    | 245 (2.4)   |                  |
| 1                                                         | 2203 (24.1)  | 81(9.7)    |                  | 2284 (22.9)                                  | 2229 (22.1) |                  |
| 2                                                         | 3348 (36.7)  | 235(28.2)  |                  | 3583 (36.0)                                  | 3724 (36.9) |                  |
| ≥3                                                        | 3365 (36.9)  | 469(59.5)  |                  | 3861 (38.7)                                  | 3903 (38.6) |                  |
| Previous other antipsychotics use (%)                     |              |            |                  |                                              |             |                  |
| Phenothiazines                                            | 5902 (64.6)  | 689 (82.6) | 0.413            | 6591 (66.1)                                  | 6493 (64.3) | 0.043            |
| Thioxanthene derivatives                                  | 3413 (37.4)  | 440 (52.8) | 0.316            | 3853 (38.7)                                  | 3638 (36)   | 0.057            |
| Diphenylbutylpiperidine derivatives                       | 222 (2.4)    | 44 (5.3)   | 0.150            | 265 (2.7)                                    | 288 (2.8)   | 0.011            |
| Butyrophenone derivatives                                 | 6532 (71.5)  | 621 (74.5) | 0.069            | 7155 (71.8)                                  | 7245 (71.7) | 0.001            |
| Benzamides                                                | 3949 (43.2)  | 364 (43.6) | 0.013            | 4320 (43.4)                                  | 4903 (48.5) | 0.103            |
| Indole derivatives                                        | 536 (5.9)    | 65 (7.8)   | 0.076            | 602 (6.0)                                    | 753 (7.5)   | 0.057            |
| Diazepines, oxazepines, thiazepines and oxepines          | 3605 (39.5)  | 237 (28.4) | 0.232            | 3843 (38.6)                                  | 4239 (42)   | 0.071            |
| Other antipsychotics                                      | 6563 (71.9)  | 478 (57.3) | 0.312            | 7043 (70.7)                                  | 7400 (73.3) | 0.059            |
| Mental illness diagnoses (%)                              |              |            |                  |                                              |             |                  |
| Depression                                                | 1132 (12.4)  | 61 (7.3)   | 0.170            | 1194 (12.0)                                  | 1283 (12.7) | 0.048            |
| Bipolar disorder                                          | 1118 (12.2)  | 73 (8.8)   | 0.118            | 1192 (12.0)                                  | 1362 (13.5) | 0.006            |
| Dementia                                                  | 154 (1.7)    | 2 (0.2)    | 0.148            | 156 (1.6)                                    | 165 (1.6)   | 0.050            |
| History of immunological diseases (%)                     | 248 (2.7)    | 18 (2.2)   | 0.032            | 265 (2.7)                                    | 191 (1.9)   | 0.028            |

<sup>a</sup> Standardized mean difference

Table 2. Incidence rate ratios (IRR) of hematological malignancy (HM) with 95% confidence intervals (CI)

|                    | Cohort size | Average follow-up duration (days) | Number of HM cases | Crude incidence rate of HM per 100,000 person-year | Weighted incidence rate of HM per 100,000 person-year | Crude IRR (CI)    | Weighted IRR (CI) | Weighted absolute rate difference per 100,000 person-years (CI) |
|--------------------|-------------|-----------------------------------|--------------------|----------------------------------------------------|-------------------------------------------------------|-------------------|-------------------|-----------------------------------------------------------------|
| Main analysis      | 9,965       | 2821.47                           | 39                 | 50.66                                              | 78.01                                                 |                   |                   | 57.40 (33.24,81.55)                                             |
| Olanzapine         | 9,131       | 2664.43                           | 30                 | 45.04                                              | 43.75                                                 | Ref.              | Ref.              |                                                                 |
| Clozapine          | 834         | 4540.90                           | 9                  | 86.80                                              | 101.15                                                | 1.93 (0.86,3.90)  | 2.22 (1.52,3.34)  |                                                                 |
| Men                | 4,644       | 2763.26                           | 18                 | 51.23                                              | 76.01                                                 |                   |                   | 46.04 (9.57,82.52)                                              |
| Olanzapine         | 4,199       | 2581.79                           | 15                 | 50.54                                              | 48.98                                                 | Ref.              | Ref.              |                                                                 |
| Clozapine          | 445         | 4475.57                           | 3                  | 55.02                                              | 95.02                                                 | 1.09 (0.25,3.30)  | 2.33 (1.33,4.31)  |                                                                 |
| Women              | 5,321       | 2872.28                           | 21                 | 50.19                                              | 72.26                                                 |                   |                   | 54.27 (23.41,85.14)                                             |
| Olanzapine         | 4,932       | 2734.78                           | 15                 | 40.62                                              | 39.34                                                 | Ref.              | Ref.              |                                                                 |
| Clozapine          | 389         | 4615.64                           | 6                  | 122.06                                             | 93.61                                                 | 3.00 (1.07,7.39)  | 2.35 (1.38,4.24)  |                                                                 |
| Aged 44 or younger | 4,821       | 3196.96                           | 8                  | 18.96                                              | 27.93                                                 |                   |                   | 23.49 (4.33,42.64)                                              |
| Olanzapine         | 4,301       | 2980.84                           | 5                  | 14.24                                              | 13.75                                                 | Ref.              | Ref.              |                                                                 |
| Clozapine          | 520         | 4984.57                           | 3                  | 42.27                                              | 37.24                                                 | 2.97 (0.61,12.10) | 2.71 (1.15,7.67)  |                                                                 |
| Aged 45 - 64       | 3,967       | 2620.41                           | 22                 | 77.30                                              | 110.06                                                |                   |                   | 72.69 (25.06,120.31)                                            |
| Olanzapine         | 3,674       | 2518.13                           | 17                 | 67.12                                              | 66.96                                                 | Ref.              | Ref.              |                                                                 |
| Clozapine          | 293         | 3902.97                           | 5                  | 159.7                                              | 139.65                                                | 2.38 (0.78,6.01)  | 2.07 (1.24,3.65)  |                                                                 |
| Aged 65 or older   | 1,177       | 1961.14                           | 9                  | 142.41                                             | 192.19                                                |                   |                   | 137.22 (0.00,301.95)                                            |
| Olanzapine         | 1,156       | 1952.16                           | 8                  | 129.48                                             | 129.34                                                | Ref.              | Ref.              |                                                                 |
| Clozapine          | 21          | 2455.48                           | 1                  | 708.33                                             | 266.55                                                | 5.47 (0.29,29.81) | 1.90 (0.62,5.78)  |                                                                 |



eTable 1. ICD-9-CM diagnostic codes and generic drug names used to define covariates

| Disease name/ Drug category                                                | ICD-9-CM codes/ drug names                                               |
|----------------------------------------------------------------------------|--------------------------------------------------------------------------|
| Hematological malignancy                                                   |                                                                          |
| Lymphosarcoma and reticulosarcoma                                          | 200                                                                      |
| Hodgkin's disease                                                          | 201                                                                      |
| Other malignant neoplasms of lymphoid and histiocytic tissue               | 202                                                                      |
| Multiple myeloma and immunoproliferative neoplasms                         | 203                                                                      |
| Lymphoid leukaemia                                                         | 204                                                                      |
| Myeloid leukaemia                                                          | 205                                                                      |
| Monocytic leukaemia                                                        | 206                                                                      |
| Other specified leukaemia                                                  | 207                                                                      |
| Leukaemia of unspecified cell type                                         | 208                                                                      |
| Polycythemia vera                                                          | 238.4                                                                    |
| Neoplasm of uncertain behavior of histiocytic and mast cells               | 238.5                                                                    |
| Neoplasm of uncertain behavior of plasma cells                             | 238.6                                                                    |
| Neoplasm of uncertain behavior of other lymphatic and hematopoietic tissue | 238.7                                                                    |
| Mental illnesses                                                           |                                                                          |
| Depression                                                                 | 296.2, 296.3, 300.4, 625.4, 293.83, 311, 648.4, 300.0                    |
| Bipolar disorder                                                           | 296                                                                      |
| Dementia                                                                   | 290, 294.1, 294.2, 294.8, 331.0, 331.1, 331.82                           |
| Immunological disease                                                      | 42, 43, 44, 266.2, 273.0, 273.1, 273.2, 277.2, 277.6, 279, 288.1, 289.89 |
| Autoimmune Diseases:                                                       |                                                                          |
| Vitiligo                                                                   | 709.01                                                                   |
| Addison disease                                                            | 255.4                                                                    |
| Alopecia areata                                                            | 704.01                                                                   |
| Autoimmune/Hashimoto's thyroiditis                                         | 245.2                                                                    |
| Graves' disease                                                            | 242                                                                      |
| Morphoea                                                                   | 701                                                                      |
| Multiple sclerosis                                                         | 340                                                                      |
| Myasthenia gravis                                                          | 358                                                                      |
| Pernicious anaemia                                                         | 281                                                                      |
| Primary biliary cirrhosis                                                  | 571.6                                                                    |
| Takayasu arteritis                                                         | 446.7                                                                    |
| Type 1 diabetes mellitus                                                   | 250.X1, 250.X3                                                           |
| Associated Conditions:                                                     |                                                                          |
| Episcleritis/scleritis                                                     | 379.0X                                                                   |
| Erythema nodosum                                                           | 695.2                                                                    |
| Haemolytic anaemia                                                         | 283.XX                                                                   |

|                                                  |                                                                                        |
|--------------------------------------------------|----------------------------------------------------------------------------------------|
| Immune thrombocytopenia purpura                  | 287.31                                                                                 |
| Leukocytoclastic vasculitis                      | 446.29                                                                                 |
| Myositis                                         | 729.1                                                                                  |
| Pulmonary fibrosis/interstitial lung disease     | 515. X, 516.31                                                                         |
| Raynaud's syndrome                               | 443                                                                                    |
| Sjögren's syndrome/sicca syndrome                | 710.2                                                                                  |
| Thrombocytopenia purpura                         | 287.3                                                                                  |
| Vasculitis                                       | 447.6                                                                                  |
| Juvenile idiopathic arthritis (JIA)              | 714.30, 714.31, 714.32, 714.33, 714.2                                                  |
| Acquired immune deficiencies                     | 42, 43, 44                                                                             |
| Asthma                                           | 493                                                                                    |
| Previous antipsychotic use                       |                                                                                        |
| Phenothiazines                                   | Chlorpromazine, Perphenazine, Fluphenazine, Trifluoperazine, Pericyazine, Thioridazine |
| Thioxanthene derivatives                         | Flupenthixol, Zuclopenthixol, Thiothixene                                              |
| Diphenylbutylpiperidine derivatives              | Pimozide                                                                               |
| Butyrophenone derivatives                        | Haloperidol, Droperidol                                                                |
| Benzamides                                       | Sulpiride, Amisulpride                                                                 |
| Indole derivatives                               | Lurasidone, Ziprasidone, Molindone, Sertindole                                         |
| Diazepines, oxazepines, thiazepines and oxepines | Quetiapine, Asenapine                                                                  |
| Other antipsychotics                             | Aripiprazole, Brexpiprazole, Risperidone, Paliperidone                                 |

---

eTable 2. Sensitivity analysis: incidence rate ratios (IRR) of hematological malignancy (HM) with 95% confidence intervals (CI)

|                                                                     | Cohort size | Average follow-up duration (days) | Number of HM cases | Crude incidence rate of HM per 100,000 person-year | Weighted incidence rate of HM per 100,000 person-year | Crude IRR (HR for Cox regression) | Weighted IRR (HR for Cox regression) | Weighted absolute rate difference per 100,000 person-years (CI) |
|---------------------------------------------------------------------|-------------|-----------------------------------|--------------------|----------------------------------------------------|-------------------------------------------------------|-----------------------------------|--------------------------------------|-----------------------------------------------------------------|
| Restricting to those who used clozapine or olanzapine for 180+ days | 6,091       | 2781.40                           | 21                 | 45.27                                              | 59.46                                                 |                                   |                                      | 34.79 (6.94,62.65)                                              |
| Olanzapine                                                          | 5,529       | 2618.33                           | 16                 | 40.37                                              | 38.85                                                 | Ref.                              | Ref.                                 |                                                                 |
| Clozapine                                                           | 562         | 4385.72                           | 5                  | 74.09                                              | 73.65                                                 | 1.84 (0.6,4.69)                   | 2.29 (1.29, 4.07)                    |                                                                 |
| Right-censoring patients at 3 years after treatment discontinuation | 9,965       | 2709.44                           | 39                 | 52.76                                              | 79.99                                                 |                                   |                                      | 56.53 (31.76,81.29)                                             |
| Olanzapine                                                          | 9,131       | 2546.58                           | 30                 | 47.12                                              | 45.79                                                 | Ref.                              | Ref.                                 |                                                                 |
| Clozapine                                                           | 834         | 4492.47                           | 9                  | 87.74                                              | 102.32                                                | 1.93 (0.86,3.91)                  | 2.22 (1.32, 4.19)                    |                                                                 |
| Multivariable Poisson regression                                    | 9,965       | 2821.47                           | 39                 | 50.66                                              | 78.01                                                 |                                   |                                      | -                                                               |
| Olanzapine                                                          | 9,131       | 2664.43                           | 30                 | 45.04                                              | 43.75                                                 | Ref.                              | Ref.                                 |                                                                 |
| Clozapine                                                           | 834         | 4540.90                           | 9                  | 86.80                                              | 101.15                                                | 1.93 (0.86,3.90)                  | 2.53 (1.04, 5.42)                    |                                                                 |
| Weighted Cox regression                                             | 9,965       | 2821.47                           | 39                 | 50.66                                              | 78.01                                                 |                                   |                                      | 57.40 (33.24,81.55)                                             |
| Olanzapine                                                          | 9,131       | 2664.43                           | 30                 | 45.04                                              | 43.75                                                 | Ref.                              | Ref.                                 |                                                                 |
| Clozapine                                                           | 834         | 4540.90                           | 9                  | 86.80                                              | 101.15                                                | 1.95 (0.91, 4.19)                 | 2.28 (0.80, 6.48)                    |                                                                 |
| Using asthma as negative control outcome                            | 9,814       | 2817.21                           | 74                 | 97.76                                              | 106.17                                                |                                   |                                      | 8.73 (0.00, 37.93)                                              |
| Olanzapine                                                          | 8,989       | 2660.68                           | 64                 | 97.74                                              | 100.30                                                | Ref.                              | Ref.                                 |                                                                 |
| Clozapine                                                           | 825         | 4522.73                           | 10                 | 97.89                                              | 110.20                                                | 1.01 (0.52, 1.97)                 | 0.90 (0.66,1.21)                     |                                                                 |
| Using other cancers as negative control outcome                     | 9,982       | 2747.85                           | 597                | 794.98                                             | 644.99                                                |                                   |                                      | 175.53 (97.68, 253.3)                                           |
| Olanzapine                                                          | 9,140       | 2595.88                           | 497                | 765.1                                              | 749.89                                                | Ref.                              | Ref.                                 |                                                                 |
| Clozapine                                                           | 842         | 4397.43                           | 70                 | 690.52                                             | 574.35                                                | 0.90 (0.70, 1.15)                 | 0.77 (0.68,0.86)                     |                                                                 |
